# Supplementary material for: The intact postsynaptic protein neurogranin is reduced in brain tissue from patients with familial and sporadic Alzheimer’s disease
Source: Acta Neuropathol. 2018 Sep 22;137(1):89–102. doi: 10.1007/s00401-018-1910-3 (PMC6338696; doi:10.1007/s00401-018-1910-3)
Supplement: Supplementary file 7 — Summary of results and p values from study 2. p values for the peptide-to-total full-length Ng ratios in the second study. Comparisons between groups were performed using Kruskal–Wallis test with data adjusted for post-mortem delay, followed by pairwise Mann–Whitney U tests if significant. *These peptides have the exact same mass and can therefore not be distinguished during sample analysis. §These peptides have the exact same mass and can therefore not be distinguished during sample analysis (XLSX 13 kb) [file 401_2018_1910_MOESM7_ESM.xlsx]

## Sheet: Sheet1
Peptide	AD vs FAD	AD vs Co	AD vs CU-AP	FAD vs Co	FAD vs CU-AP	Co vs CU-AP
Ng53-75	p = 0.15	p = 0.15	p = 0.15	p = 0.005	p = 0.005	p = 0.85
Ng53-76	p = 1.0	p = 0.004	p = 0.007	p = 0.0005	p = 0.002	p = 1.0
Ng53-78	p = 0.09	p = 0.002	p = 0.01	p = 0.0002	p = 0.0006	p = 0.85
Ng52-78	p = 0.62	p = 0.04	p = 0.04	p = 0.004	p = 0.009	p = 0.62
Ng48-75+Ng49-76*	p = 0.99	p = 0.11	p = 0.04	p = 0.04	p = 0.02	p = 0.99
Ng48-76	p = 0.10	p = 0.06	p = 0.005	p = 0.15	p = 0.01	p = 0.26
Ng48-78	p = 1.0	p = 0.19	p = 0.19	p = 0.06	p = 0.19	p = 1.0
Ng46-78	p = 0.17	p = 0.54	p = 0.17	p = 0.04	p = 0.0004	p = 0.36
Ng44-78	p = 0.08	p = 0.95	p = 0.08	p = 0.08	p = 0.0007	p = 0.33
*These peptides have the exact same mass and can therefore not be distinguished during sample analysis.
